# Supplementary material for: A DNA tetrahedral nanomaterial-based dual-signal ratiometric electrochemical aptasensor for the detection of ochratoxin A in corn kernel samples
Source: Royal Society of Chemistry journal article supplement (doi:10.1039/d2an00934j), 2022-01-01
Supplement: d2an00934j1.pdf [file d2an00934j1.pdf]

## Supplementary Material

### **DNA tetrahedral-based dual-signal ratiometric electrochemical aptasensor for the detection of ochratoxin A in corn kernels samples**

Yu-Long Li, Fa-Ting Xie, Cao Yao, Gui-Qun Zhang, Yan Guan, Yun-Hui Yang, Jian-Mei Yang\*, Rong Hu\*  
*College of Chemistry and Chemical Engineering, Yunnan Normal University, Kunming · 650500, P. R. China.*

Corresponding author: Rong Hu

E-mail: hudierong\_168@163.com; yangatynnu@163.com

Tel: +86-871-65149087

## Table of contents

### Supplementary figures

|                  |       |          |
|------------------|-------|----------|
| <b>Table S1</b>  | ----- | <b>3</b> |
| <b>Table S2</b>  | ----- | <b>3</b> |
| <b>Table S3</b>  | ----- | <b>3</b> |
| <b>Table S4</b>  | ----- | <b>4</b> |
| <b>Figure S1</b> | ----- | <b>5</b> |
| <b>Figure S2</b> | ----- | <b>6</b> |
| <b>Figure S3</b> | ----- | <b>7</b> |
| <b>Figure S4</b> | ----- | <b>8</b> |

**Table S1** The DNA sequences used in experiment

| Name              | DNA sequences                                                                                              |
|-------------------|------------------------------------------------------------------------------------------------------------|
| Tetra-OTA         | CAC CCA CAC CCG ATC TTTTTTTTTT ACA TTC CTA AGT CTG AAA<br>CAT TAC AGC TTG CTA CAC GAG AAG AGC CGC CAT AGTA |
| Tetra-OTA 2       | CAC CCA CAC CCG ATC TTTTTTTTTT-C <sub>6</sub> -SH                                                          |
| Tetra-X           | HS-C <sub>6</sub> -TAT CAC CAG GCA GTT GAC AGT GTA GCA AGC TGT AAT AGA<br>TGC GAG GGT CCA ATA C            |
| Tetra-Y           | HS-C <sub>6</sub> -TCA ACT GCC TGG TGA TAA AAC GAC ACT ACG TGG GAA TCT<br>ACT ATG GCG GCT CTT C            |
| Tetra-Z           | HS-C <sub>6</sub> -TTC AGA CTT AGG AAT GTG CTT CCC ACG TAG TGT CGT TTG<br>TAT TGG ACC CTC GCA T            |
| OTA aptamer<br>P1 | GAT CGG GTG TGG GTG GCG TAA AGG GAG CAT CGG ACA<br>T CGG GTG TGG GTG TTTTTTTTTT-biotin                     |

**Table S2** Comparison of response signal data of ratiometric and non-ratiometric sensors

|                          | $I_{\text{UiO-66-SP}}$                | $I_{\text{UiO-66-SP}}/I_{[\text{Fe}(\text{CN})_6]^{3-/4-}\text{-IR}}$ | RSD (%) |
|--------------------------|---------------------------------------|-----------------------------------------------------------------------|---------|
| Non-ratiometric<br>probe | 10.66 <sup>a</sup> ±0.45 <sup>b</sup> |                                                                       | 43.85   |
| Ratiometric<br>probe     |                                       | 4.09 <sup>a</sup> ±0.11 <sup>b</sup>                                  | 3.71    |

(a) Average of 20 measurement results (b) Standard deviation

**Table S3** Recovery and determination of OTA in red wine samples

| Sample | Added<br>(ng/mL) | Found<br>(ng/mL) | RSD (%) | Recovery (%) |
|--------|------------------|------------------|---------|--------------|
| 1      | 5.0              | 4.7236           | 6.51    | 94.5         |
|        |                  | 4.6620           |         | 93.2         |
|        |                  | 5.2403           |         | 104.8        |
| 2      | 0.5              | 0.5085           | 2.96    | 101.7        |
|        |                  | 0.5098           |         | 102.0        |
|        |                  | 0.5357           |         | 107.1        |
| 3      | 0.005            | 0.0053           | 6.52    | 106          |
|        |                  | 0.0048           |         | 96           |
|        |                  | 0.0047           |         | 94           |

**Table S4** Comparison of detection of OTA in peanut and melon seeds samples with ELISA kit

| <b>Sample</b>      | <b>Detention Method</b> | <b>OTA detected (ng/mL)</b> | <b>Average (ng/mL)</b> | <b>RSD (%)</b> |
|--------------------|-------------------------|-----------------------------|------------------------|----------------|
| <b>Peanut</b>      | ELISA kit               | 0.51                        | 0.51                   | 2.99           |
|                    |                         | 0.49                        |                        |                |
|                    |                         | 0.52                        |                        |                |
| <b>Peanut</b>      | This work               | 0.58                        | 0.57                   | 4.64           |
|                    |                         | 0.54                        |                        |                |
|                    |                         | 0.59                        |                        |                |
| <b>Melon seeds</b> | ELISA kit               | 1.24                        | 1.26                   | 3.00           |
|                    |                         | 1.23                        |                        |                |
|                    |                         | 1.30                        |                        |                |
| <b>Melon seeds</b> | This work               | 1.34                        | 1.32                   | 1.52           |
|                    |                         | 1.30                        |                        |                |
|                    |                         | 1.32                        |                        |                |

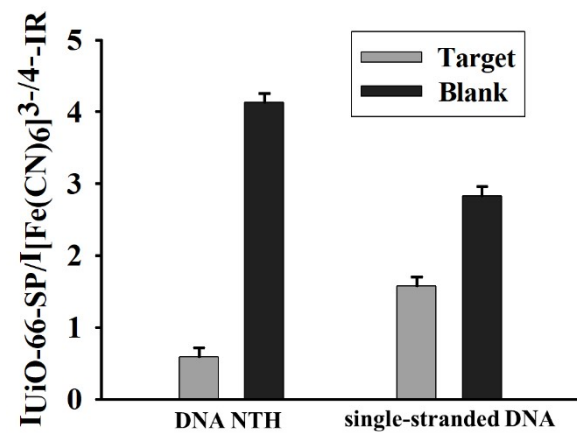

Fig. S1 Comparison of DNA NTH and single-stranded DNA sensors.

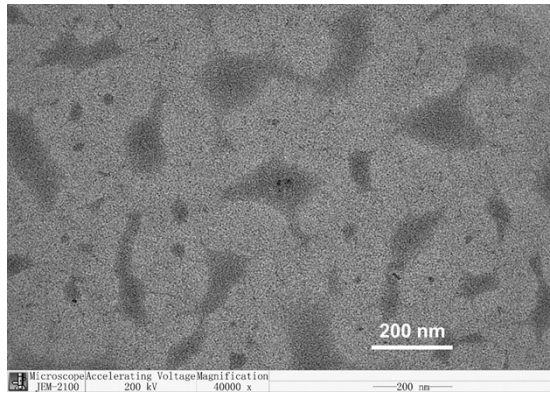

**Fig. S2** TEM image of DNA NTH.

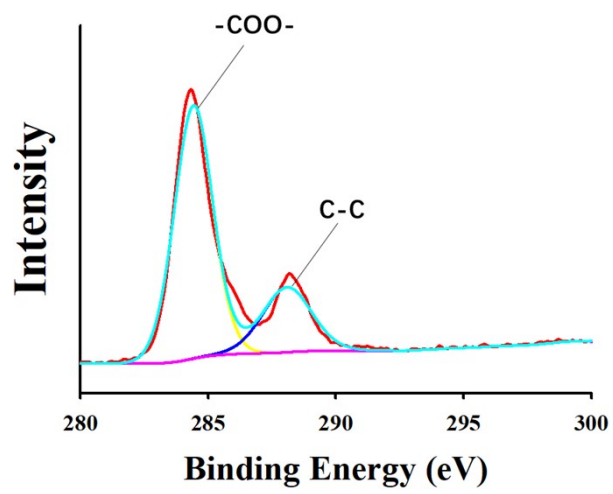

**Fig. S3** The XPS of C 1s

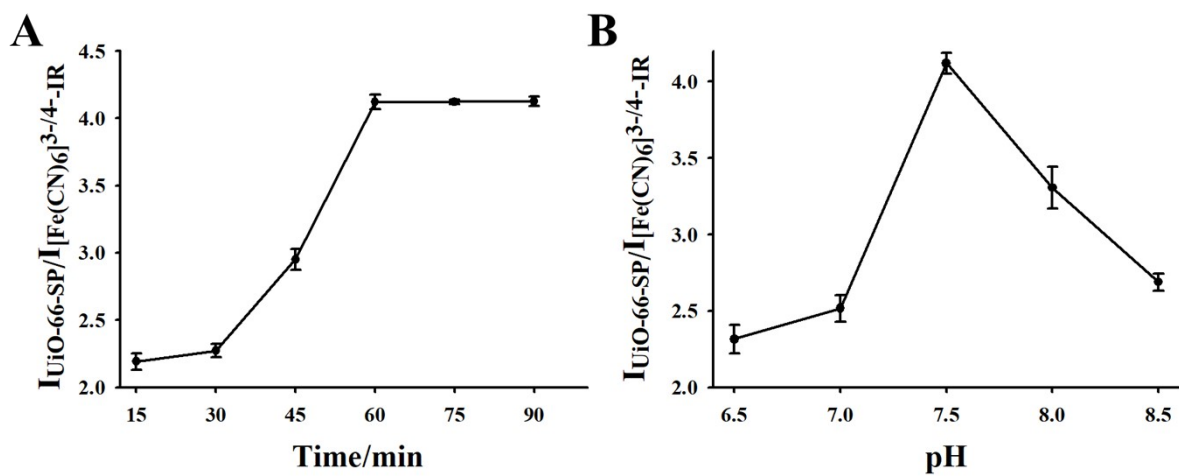

**Fig. S4** The effect of (A) pH value of buffer and (B) incubation time of UiO-66-SP on the current response ratio.
